# Supplementary material for: Immobilization of Enzymes on a Phospholipid Bionically Modified Polysulfone Gradient-Pore Membrane for the Enhanced Performance of Enzymatic Membrane Bioreactors
Source: MDPI journal article supplement (doi:10.3390/molecules23010144), 2018-01-11
Supplement: s1 [file s1]

## Support information:

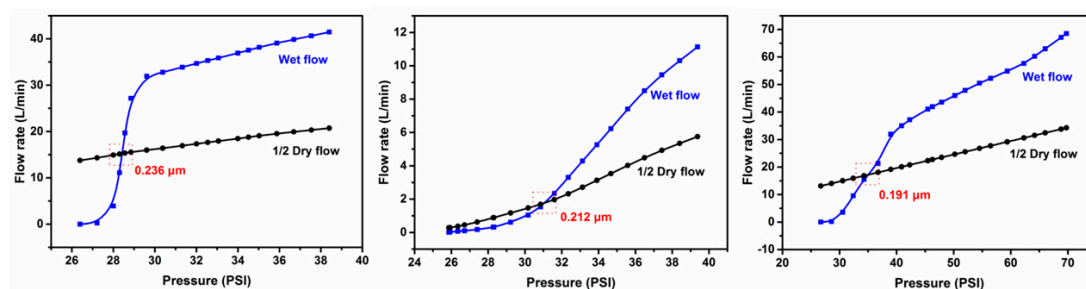

**Figure S1.** Sketch of the pressure-flow rate curves measured by LLP. (a) Blank RGM-PSF membrane; (b) Lecithin-modified RGM-PSF membrane; (c) Lipase immobilized RGM-PSF membrane;

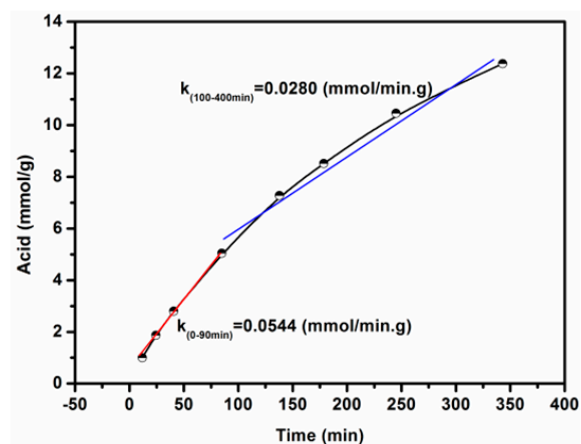

**Figure S2.** Time course of TA hydrolysis in the bioreactor.

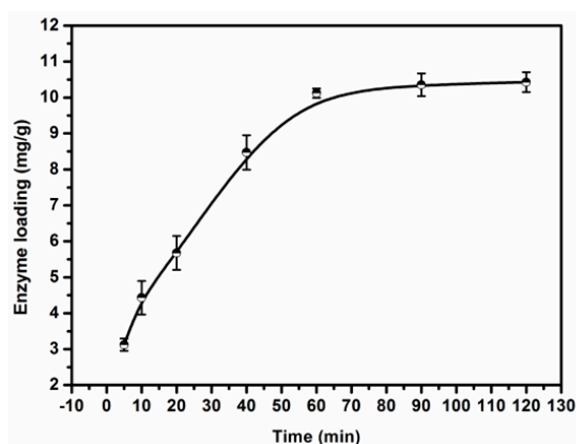

**Figure S3.** Effect of time on the enzyme loading.

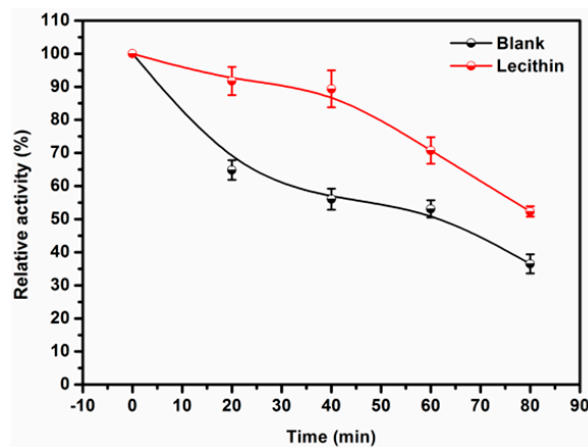

**Figure S4.** Thermal stability of the lecithin-modified EMBR and blank EMBR.

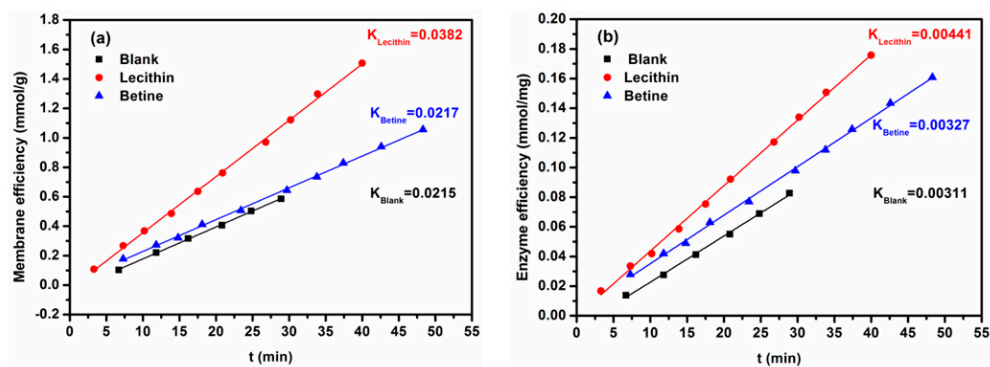

**Figure S5.** The comparison of the activity of membrane and enzyme between different surfactants modified EMBRs.
